# Supplementary material for: Transketolase-Like 1 Expression Is Modulated during Colorectal Cancer Progression and Metastasis Formation
Source: PLoS One. 2011 Sep 27;6(9):e25323. doi: 10.1371/journal.pone.0025323 (PMC3181277; doi:10.1371/journal.pone.0025323)
Supplement: Table S1 — Clinico-pathological and immunohistochemical data. Id, arbitrary number used to preserve the privacy of patients; a.u., arbitrary units; M, male; F, female. (XLS) [file pone.0025323.s001.xls]

## Sheet: Hoja2
Id	Stage	Sex	Age	TKTL1 (a.u.)	T (primary Tumor)	N (lymph Node)	M (Metastasis)
7001	I	M	70	26.4167	2	0	0
7002	I	M	80	12.75	2	0	0
7012	I	F	79	15.8667	1	0	0
7023	I	M	78	1.75	2	0	0
7058	I	M	58	19.1667	1	0	0
7116	I	F	66	20.6	1	0	0
7160	I	F	45	8.06667	1	0	0
7165	I	M	75	8.5	1	0	0
7168	I	M	61	6.33333	2	0	0
7004	II	M	56	10.4	3	0	0
7010	II	F	78	8	3	0	0
7020	II	F	86	35.3333	3	0	0
7026	II	M	60	27	4	0	0
7030	II	F	93	25.5	3	0	0
7052	II	M	84	27.9	3	0	0
7053	II	F	76	4	4	0	0
7062	II	M	53	12.6667	3	0	0
7084	II	M	79	13.0833	3	0	0
7115	II	M	67	13.1333	3	0	0
7117	II	M	55	24.1905	3	0	0
7122	II	M	81	6.16667	3	0	0
7123	II	M	70	37.25	3	0	0
7126	II	F	81	30.7333	3	0	0
7130	II	M	87	14.3333	3	0	0
7135	II	F	79	30.25	3	0	0
7139	II	M	60	15.9167	3	0	0
7148	II	F	73	26	3	0	0
7151	II	F	68	29.8667	3	0	0
7152	II	M	74	20.2	3	0	0
7169	II	M	70	25.6667	3	0	0
7005	III	M	67	24.7	4	2	0
7011	III	F	76	25.3333	3	1	0
7028	III	M	76	45.5333	2	1	0
7042	III	M	74	50	3	2	0
7048	III	F	61	47.7333	3	2	0
7051	III	M	68	35.6667	3	1	0
7056	III	F	76	24	3	1	0
7092	III	M	73	43.25	3	2	0
7096	III	F	83	17.3333	3	1	0
7109	III	M	41	21	3	1	0
7111	III	M	73	40.5833	3	1	0
7112	III	M	76	24.05	3	2	0
7119	III	M	65	28.25	3	1	0
7146	III	M	51	25.625	3	2	0
7147	III	M	76	49.8333	3	2	0
7167	III	M	69	23	3	1	0
7006	IV	M	33	14.3333	3	2	1
7018	IV	M	74	5.6	3	2	1
7021	IV	M	73	20.4	3	0	1
7037	IV	M	67	9.33333	3	1	1
7055	IV	M	77	11.8	3	2	1
7061	IV	F	60	20.8	4	1	1
7095	IV	M	64	9.875	3	0	1
7099	IV	M	67	11.5	3	1	1
7104	IV	M	86	12.3333	-	-	1
7107	IV	M	69	16.7	3	2	1
7113	IV	M	55	17.5333	3	2	1
7118*	IV	M	64	41,3*	3	2	1
7121	IV	M	73	3.66667	4	2	1
7125	IV	M	77	4.82857	3	1	1
7128	IV	M	74	10.7667	3	0	1
7131	IV	F	67	11.8	2	0	1
7144	IV	M	57	10	4	2	1
